# Supplementary material
Source: Springer Nature journal article supplement (https://www.springermedizin.de/resource/supplementary/13054_2011_9905_MOESM2_ESM.pdf/9708460)

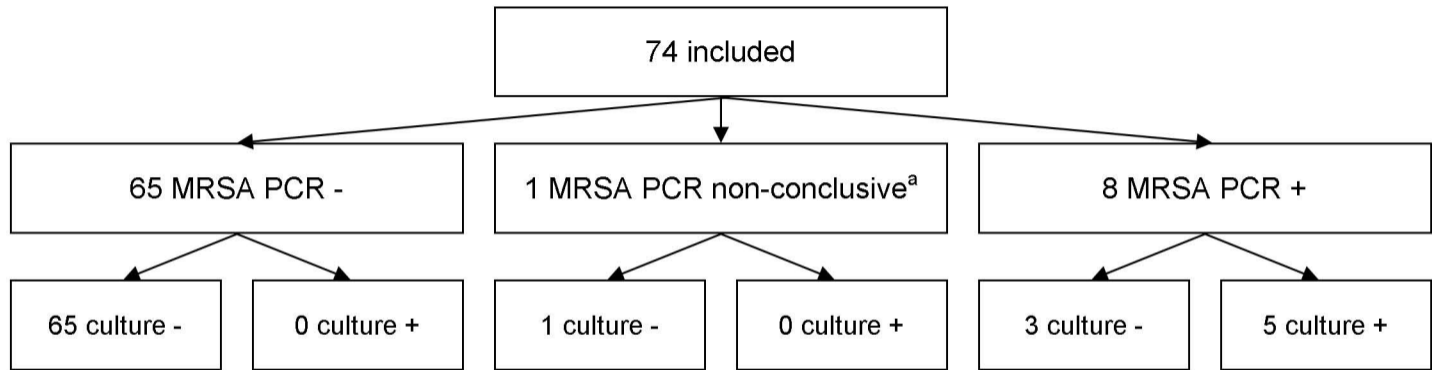

<sup>a</sup>PCR of nose swab was negative and all other sites were non-conclusive

Supplement: MOESM2 [file 9708460]
